# Supplementary material for: Pharmacophore-Based Virtual Screening of Novel Competitive Inhibitors of the Neurodegenerative Disease Target Kynurenine-3-Monooxygenase
Source: MDPI journal article supplement (doi:10.3390/molecules26113314), 2021-05-31
Supplement: s1 [file s1]

## Supplementary

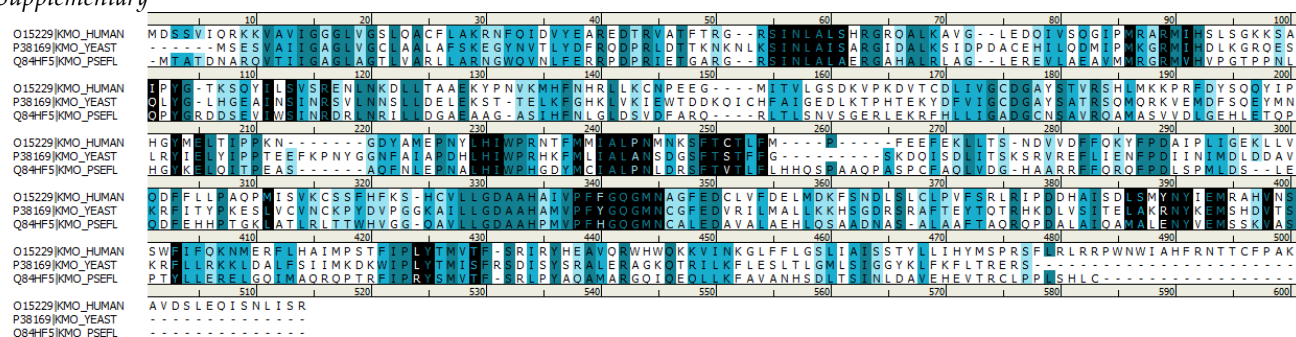

**Figure S1.** Alignment of KMO sequences for Human, *Saccharomyces cerevisiae* and *Pseudomonas fluorescens*. Amino acids colored according to their similarity. Residues within 6 Å of the ligand binding site are highlighted in black.

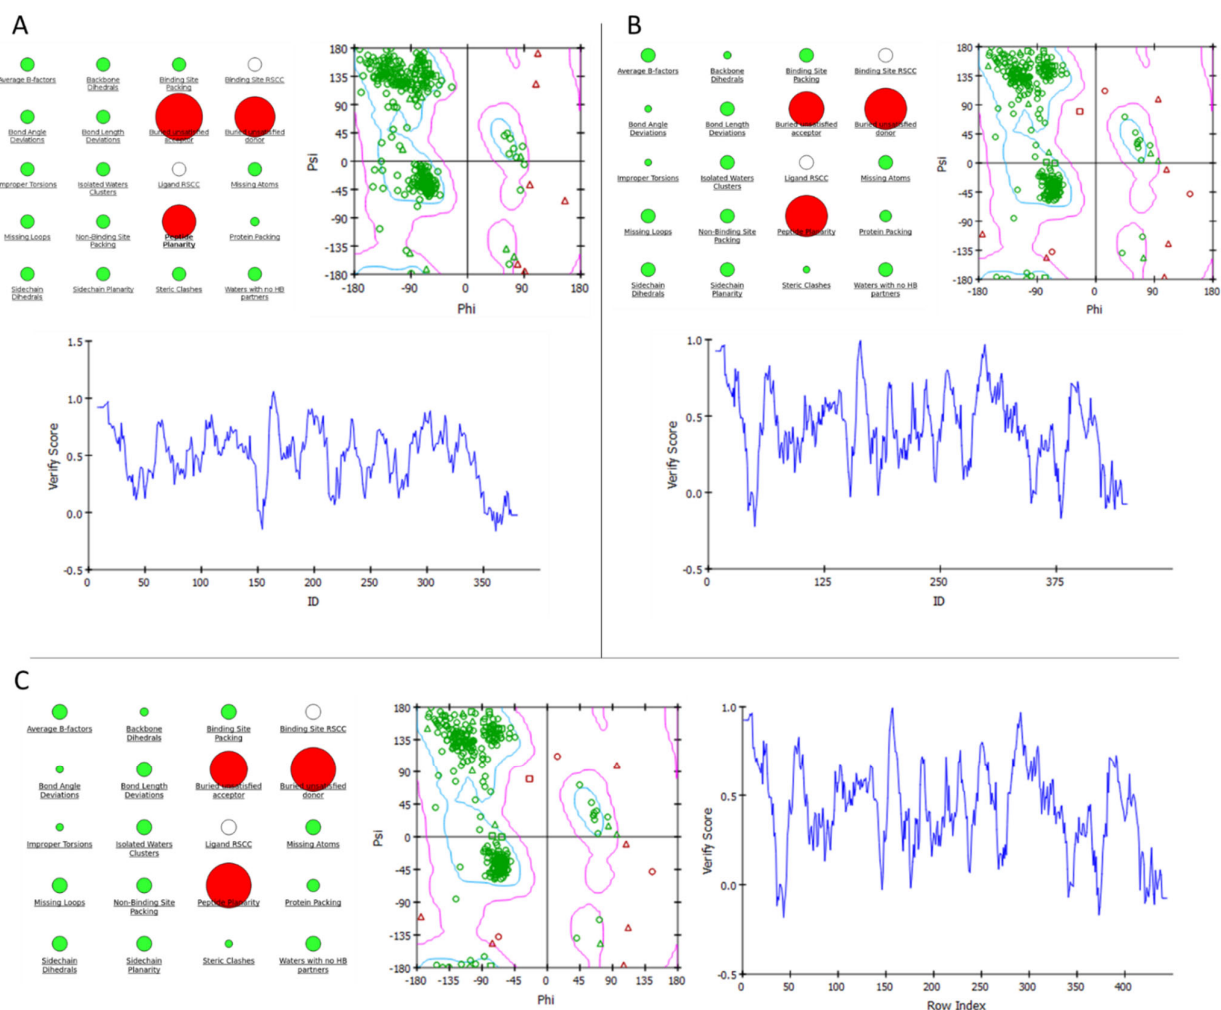

**Figure S2.** Maestro Protein Reliability Report, Ramachandran Plot and 3D Profiles score line plot for Homology Models 1-3 (A-C respectively).

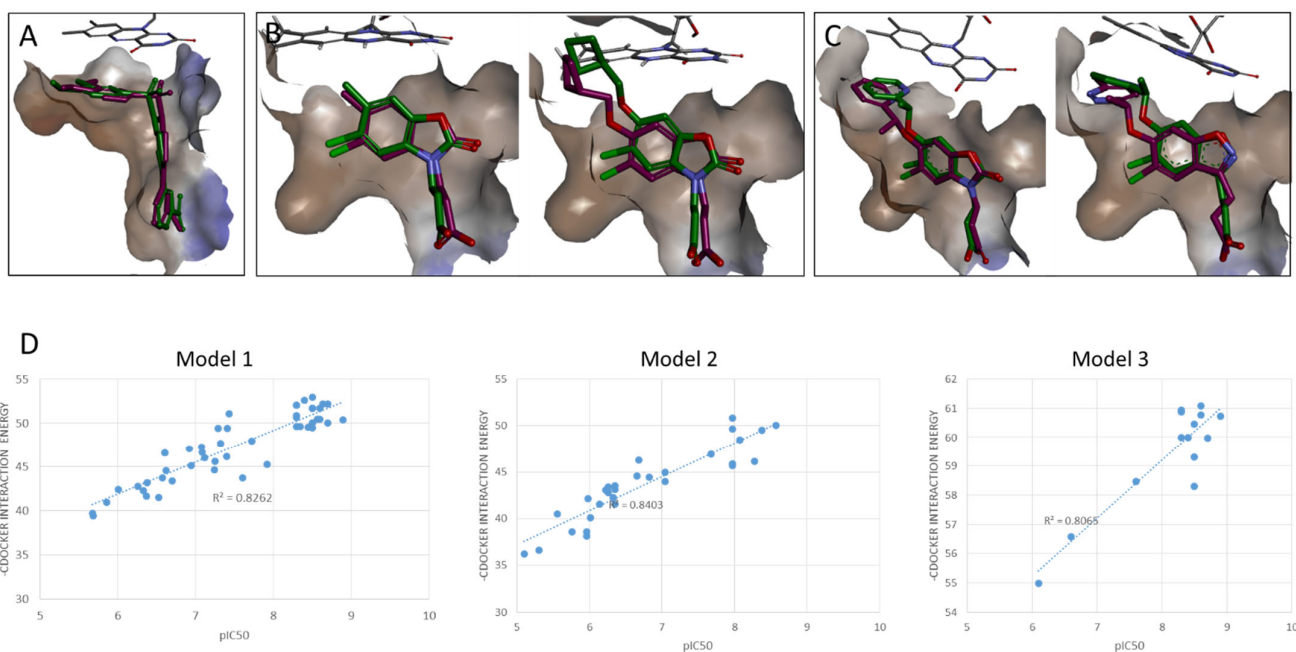

**Figure 3.** Validation of Homology Models via docking of known active inhibitors. (a) Overlay of docking and crystal structure pose of Ro 61-8084 in Model 1; (b) Overlay of docking and crystal structure pose of GSK428 (accurate) and 5MZX (least accurate) in Model 2; (c) Overlay of docking and crystal structure pose of GSK775 (most accurate) and GSK366 (least accurate) in Model 3. Crystal binding poses represented as green sticks, docking poses – magenta sticks, FAD shown in grey stick format. (d) Correlation plots between KMO inhibitor activity and docking score.

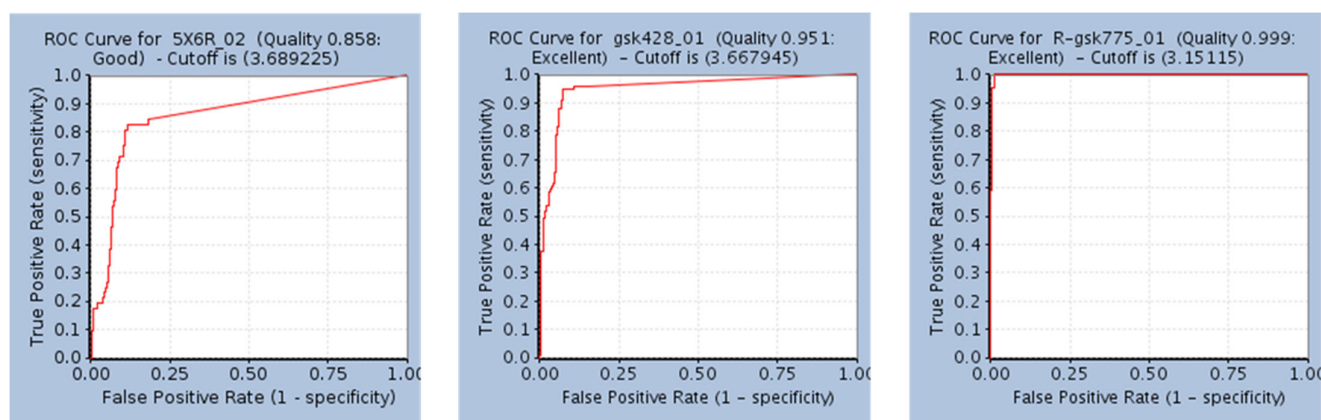

**Figure S4.** Receiver Operating Characteristic (ROC) plots for (a) Ro 61-8084 based pharmacophore (Model 1); (b) GSK428 based pharmacophore (Model 2); (c) GSK775 based pharmacophore (Model 3).

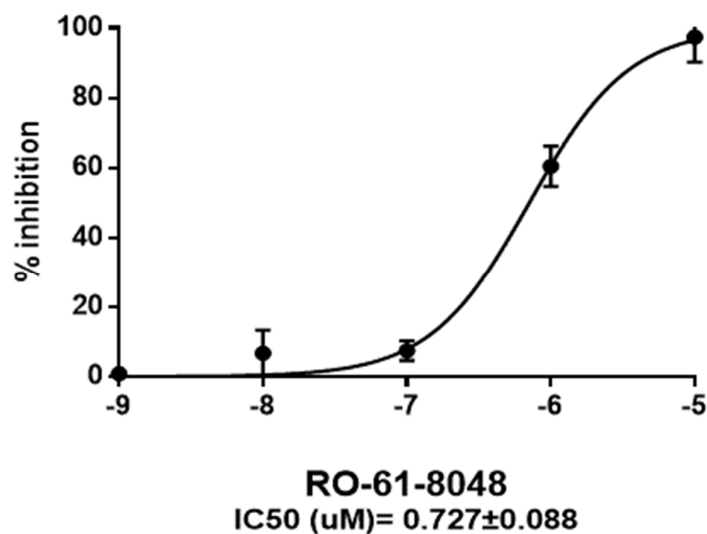

**Figure S5.** Obtained dose–response curve for Ro-61-8048 in the KMO fluorescence assay.

**Table S1.** Homology Modelling Template Parameters.

|               |            | Model 1                                                                                                        | Model 2                                                                                    | Model 3                                              |             |
|---------------|------------|----------------------------------------------------------------------------------------------------------------|--------------------------------------------------------------------------------------------|------------------------------------------------------|-------------|
| Model Purpose |            | Competitive Inhibitor Model                                                                                    | Non-substrate Effector Model                                                               | Competitive Inhibitor Model                          |             |
| Template Info | PDB code   | 5X6R                                                                                                           | 5NAK                                                                                       | 5NAK                                                 | 5NAG        |
|               | Organism   | <i>Saccharomyces cerevisiae</i>                                                                                | <i>Pseudomonas fluorescens</i>                                                             | <i>Pseudomonas fluorescens</i>                       |             |
|               | Method     | X-RAY DIFFRACTION                                                                                              | X-RAY DIFFRACTION                                                                          | X-RAY DIFFRACTION                                    |             |
|               | Resolution | 1.911 Å                                                                                                        | 1.5 Å                                                                                      | 1.5 Å                                                | 1.68 Å      |
|               | Ligands    | FAD, Ro 61-8048                                                                                                | FAD, L-kyn                                                                                 | FAD, L-kyn                                           | FAD, GSK065 |
|               | Residues   | Met1-Lys390                                                                                                    | Ala7-Leu457                                                                                | Ala7-Leu457                                          | -           |
| Comment       |            | Conformation of loop 321-PFYGQ-325 corresponds to ScKMO apo structure, C-terminal alpha helix is not displaced | Conformation of loop 318-PFHGQ-322 and C-terminal region corresponds to L-kyn bound state. | FAD in Model 2 replaced with “tilted” FAD from 5NAG. |             |

**Table S2.** Homology Model Docking Accuracy.

| Model 1                     |                              |                                   | Model 2                      |                              |                                   | Model 3                     |                              |                                   |
|-----------------------------|------------------------------|-----------------------------------|------------------------------|------------------------------|-----------------------------------|-----------------------------|------------------------------|-----------------------------------|
| Competitive Inhibitor Model |                              |                                   | Non-substrate Effector Model |                              |                                   | Competitive Inhibitor Model |                              |                                   |
| Co-crystal ligand           | Reference structure PDB code | Dock pose vs Crystal pose RMSD, Å | Co-crystal ligand            | Reference structure PDB code | Dock pose vs Crystal pose RMSD, Å | Co-crystal ligand           | Reference structure PDB code | Dock pose vs Crystal pose RMSD, Å |
| Ro 61-8048                  | 5X6R                         | 0.5739                            | L-Kyn                        | 5NAK                         | 0.4324                            | GSK065                      | 5NAG                         | 0.8381                            |
|                             |                              |                                   | UPF648                       | 4J36                         | 0.5892                            |                             |                              |                                   |
|                             |                              |                                   | GSK180                       | 5N7T                         | 0.5792                            |                             |                              |                                   |
|                             |                              |                                   | GSK428                       | 5NAB                         | 0.6043                            | GSK366                      | 5NAH                         | 1.4051                            |
|                             |                              |                                   | GSK-OEt                      | 5MZC                         | 0.5832                            |                             |                              |                                   |
|                             |                              |                                   | GSK-OcPr                     | 5MZI                         | 0.9371                            |                             |                              |                                   |
|                             |                              |                                   | GSK-OCcBu                    | 5MZK                         | 0.9768                            |                             |                              |                                   |

**Table S3.** Compound Validation sets for the Docking Protocol and Protein-Ligand Complex Pharmacophore Performance\*.

| Model 1 |           |                                                                        |                     |           |              |           |
|---------|-----------|------------------------------------------------------------------------|---------------------|-----------|--------------|-----------|
| No      | Comp name | Smiles                                                                 | Molecular Formula   | KMO pIC50 | KMO IC50, nM | reference |
| 1       | 2         | <chem>[O-]C(=O)c1cc(on1)c2cccc(c2)[N+](=O)[O-]</chem>                  | C10 H5 N2 O5        | 5.6       | 2680         | [1]       |
| 2       | 3         | <chem>[O-][N+](=O)c1cccc(c1)c2onc(c2)c3nnnn[nH]3</chem>                | C10 H6 N6 O3        | 5.9       | 1160         |           |
| 3       | 5         | <chem>Cc1ccc(cc1)S(=O)(=O)Nc2nc(cs2)c3ccc(O)c(C)c3</chem>              | C17 H16 N2 O3 S2    | 6.9       | 114          |           |
| 4       | 6         | <chem>Cc1ccc(cc1)S(=O)(=O)Nc2nc(cs2)c3ccccc3</chem>                    | C16 H14 N2 O2 S2    | 6.3       | 470          |           |
| 5       | 7         | <chem>COc1ccc(cc1)c2csc(NS(=O)(=O)c3ccc(C)cc3)n2</chem>                | C17 H16 N2 O3 S2    | 6.6       | 240          |           |
| 6       | 8         | <chem>Cc1ccc(cc1)S(=O)(=O)Nc2nc(cs2)c3ccc(Cl)cc3</chem>                | C16 H13 Cl N2 O2 S2 | 7.3       | 56           |           |
| 7       | 9         | <chem>Cc1ccc(cc1)c2csc(NS(=O)(=O)c3ccc(C)cc3)n2</chem>                 | C17 H16 N2 O2 S2    | 7.1       | 76           |           |
| 8       | 11        | <chem>Cc1ccc(cc1)S(=O)(=O)Nc2nc(cs2)c3cccc(c3)[N+](=O)[O-]</chem>      | C16 H13 N3 O4 S2    | 7.3       | 48           |           |
| 9       | 12        | <chem>[O-][N+](=O)c1cccc(c1)c2csc(NS(=O)(=O)c3ccccc3)n2</chem>         | C15 H11 N3 O4 S2    | 6.7       | 200          |           |
| 10      | 13        | <chem>[O-][N+](=O)c1cccc(c1)c2csc(NS(=O)(=O)c3ccc(Cl)c(Cl)c3)n2</chem> | C15 H9 Cl2 N3 O4 S2 | 6.9       | 120          |           |
| 11      | 14        | <chem>[O-][N+](=O)c1cccc(c1)c2csc(NS(=O)(=O)c3ccc(Cl)cc3)n2</chem>     | C15 H10 Cl N3 O4 S2 | 7.1       | 84           |           |
| 12      | 15        | <chem>COc1ccc(cc1)S(=O)(=O)Nc2nc(cs2)c3cccc(c3)[N+](=O)[O-]</chem>     | C16 H13 N3 O5 S2    | 7.3       | 51           |           |
| 13      | 17        | <chem>Nc1ccc(cc1)S(=O)(=O)Nc2nc(cs2)c3cccc(c3)[N+](=O)[O-]</chem>      | C15 H12 N4 O4 S2    | 7.4       | 40           |           |
| 14      | 18        | <chem>CC(C)c1ccc(cc1)S(=O)(=O)Nc2nc(cs2)c3cccc(c3)[N+](=O)[O-]</chem>  | C18 H17 N3 O4 S2    | 6.0       | 990          |           |
| 15      | 19        | <chem>COc1ccc(cc1OC)S(=O)(=O)Nc2nc(cs2)c3cc(ccc3F)C(F)(F)F</chem>      | C18 H14 F4 N2 O4 S2 | 7.4       | 39           |           |
| 16      | 20        | <chem>Nc1ccc(cc1)S(=O)(=O)Nc2nc(cs2)c3ccc(ccc3F)C(F)(F)F</chem>        | C16 H11 F4 N3 O2 S2 | 7.7       | 19           |           |
| 17      | 11        | <chem>[O-]C(=O)CCN1C(=O)Oc2cc(OCCN3CCCC3)c(Cl)cc12</chem>              | C16 H18 Cl N2 O5    | 6.1       | 794          | [2]       |
| 18      | 12        | <chem>[O-]C(=O)CCN1C(=O)Oc2cc(OC(=O)c3ccccc3)c(Cl)cc12</chem>          | C17 H11 Cl N O6     | 7.6       | 25.1         |           |
| 19      | 13        | <chem>[O-]C(=O)CCN1C(=O)Oc2cc(OCc3ccccc3)c(Cl)cc12</chem>              | C16 H12 Cl N2 O5    | 8.5       | 3.16         |           |
| 20      | 15        | <chem>C[C@@H](Oc1cc2OC(=O)N(CCC(=O)[O-])c2cc1Cl)c3ccccc3</chem>        | C17 H14 Cl N2 O5    | 8.6       | 2.51         |           |
| 21      | 16        | <chem>C[C@H](Oc1cc2OC(=O)N(CCC(=O)[O-])c2cc1Cl)c3ccccc3</chem>         | C17 H14 Cl N2 O5    | 6.6       | 251          |           |
| 22      | 17        | <chem>C[C@@H](Oc1cc2OC(=O)N(CCC(=O)[O-])c2cc1Cl)c3occcn3</chem>        | C15 H12 Cl N2 O6    | 8.5       | 3.16         |           |
| 23      | 18        | <chem>C[C@@H](Oc1cc2OC(=O)N(CCC(=O)[O-])c2cc1Cl)c3ncccn3</chem>        | C16 H13 Cl N3 O5    | 8.3       | 5.01         |           |
| 24      | 19        | <chem>C[C@@H](Oc1cc2OC(=O)N(CCC(=O)[O-])c2cc1Cl)c3ccccc3</chem>        | C16 H13 Cl N3 O5    | 8.9       | 1.26         |           |
| 25      | 20        | <chem>C[C@@H](Oc1cc2OC(=O)N(CCC(=O)[O-])c2cc1Cl)c3cc(C)ccn3</chem>     | C18 H16 Cl N2 O5    | 8.4       | 3.98         |           |
| 26      | 21        | <chem>C[C@@H](Oc1cc2OC(=O)N(CCC(=O)[O-])c2cc1Cl)c3ccc(C)cn3</chem>     | C18 H16 Cl N2 O5    | 8.5       | 3.16         |           |
| 27      | 22        | <chem>C[C@@H](Oc1cc2OC(=O)N(CCC(=O)[O-])c2cc1Cl)c3ccc(Cl)cn3</chem>    | C17 H13 Cl2 N2 O5   | 8.5       | 3.16         |           |
| 28      | 23        | <chem>C[C@@H](Oc1cc2OC(=O)N(CCC(=O)[O-])c2cc1Cl)c3ccc(F)cn3</chem>     | C17 H13 Cl F N2 O5  | 8.6       | 2.51         |           |
| 29      | 24        | <chem>C[C@@H](Oc1cc2OC(=O)N(CCC(=O)[O-])c2cc1Cl)c3cccc(C)n3</chem>     | C18 H16 Cl N2 O5    | 8.3       | 5.01         |           |
| 30      | 25        | <chem>C[C@@H](Oc1cc2OCC(=O)N(CCC(=O)[O-])c2cc1Cl)c3ccccc3</chem>       | C18 H16 Cl N2 O5    | 8.3       | 5.01         |           |
| 31      | 26        | <chem>C[C@@H](Oc1cc2ccn(CCC(=O)[O-])c2cc1Cl)c3ccccc3</chem>            | C18 H16 Cl N2 O3    | 8.3       | 5.01         |           |
| 32      | 27        | <chem>C[C@@H](Oc1cc2cnn(CCC(=O)[O-])c2cc1Cl)c3ccccc3</chem>            | C17 H15 Cl N3 O3    | 8.5       | 3.16         |           |
| 33      | 28        | <chem>C[C@@H](Oc1cc2onc(CCC(=O)[O-])c2cc1Cl)c3ccccc3</chem>            | C17 H14 Cl N2 O4    | 8.3       | 5.01         |           |
| 34      | 29        | <chem>C[C@@H](Oc1cc2SC(=O)N(CCC(=O)[O-])c2cc1Cl)c3ccccc3</chem>        | C17 H14 Cl N2 O4 S  | 8.7       | 2.00         |           |
| 35      | 30        | <chem>C[C@@H](Oc1cc2onc(CCC(=O)[O-])c2cc1Cl)c3ccc(C)cn3</chem>         | C18 H16 Cl N2 O4    | 8.5       | 3.16         |           |
| 36      | 31        | <chem>C[C@@H](Oc1cc2onc(CCC(=O)[O-])c2cc1Cl)c3ccc(Cl)cn3</chem>        | C17 H13 Cl2 N2 O4   | 8.5       | 3.16         |           |
| 37      | 32        | <chem>C[C@@H](Oc1cc2onc(CCC(=O)[O-])c2cc1Cl)c3ccc(F)cn3</chem>         | C17 H13 Cl F N2 O4  | 8.5       | 3.16         |           |

| 38 | 33        | <chem>C[C@@H](Oc1cc2onc(CCC(=O)[O-])c2cc1Cl)c3ccc(C)nn3</chem>         | C17 H15 Cl N3 O4    | 8.7          | 2.00            |           |
|----|-----------|------------------------------------------------------------------------|---------------------|--------------|-----------------|-----------|
| 39 | 38        | <chem>Clc1ccc(cc1Cl)c2cc(NS(=O)(=O)c3ccccc3)ncn2</chem>                | C16 H11 Cl2 N3 O2 S | 6.6          | 270             | [3]       |
| 40 | 48        | <chem>[O-]C(=O)c1cc(ncn1)c2cccc(c2)c3ccccc3</chem>                     | C17 H11 N2 O2       | 5.7          | 2130            |           |
| 41 | 51        | <chem>Clc1ccc(cc1Cl)c2cc(ncn2)C(=O)NS(=O)(=O)c3ccccc3</chem>           | C17 H11 Cl2 N3 O3 S | 7.6          | 25              |           |
| 42 | 70        | <chem>[O-]C(=O)c1cc(ncn1)c2ccc(OCCN3CCOCC3)c(Cl)c2</chem>              | C17 H17 Cl N3 O4    | 7.1          | 83              |           |
| 43 | 78        | <chem>[O-]C(=O)c1cc(ncn1)c2ccc(OC3CCC3)c(Cl)c2</chem>                  | C15 H12 Cl N2 O3    | 7.9          | 12              |           |
| 44 | 80        | <chem>[O-]C(=O)c1cc(ncn1)c2ccc(OC3CCCC3)c(Cl)c2</chem>                 | C16 H14 Cl N2 O3    | 7.2          | 57              |           |
| 45 | 81        | <chem>[O-]C(=O)c1cc(ncn1)c2ccc(OC3CCCCC3)c(Cl)c2</chem>                | C17 H16 Cl N2 O3    | 6.4          | 430             |           |
| No | Comp name | Smiles                                                                 | Molecular Formula   | % Inhibition | KMO Ki, $\mu$ M | reference |
| 46 | GM141     | <chem>COc1ccc(cc1OC)C(=O)Nc2onc(n2)c3cccc(c3)[N+](=O)[O-]</chem>       | C17 H14 N4 O6       | 37.4         | 1.300           | [4]       |
| 47 | GM195     | <chem>COc1ccc(CC(=O)Nc2onc(n2)c3cccc(c3)[N+](=O)[O-])cc1OC</chem>      | C18 H16 N4 O6       | 32.0         | 1.820           |           |
| 48 | GM303     | <chem>Clc1ccc(cc1Cl)c2noc(NC(=O)c3ccccc3)n2</chem>                     | C15 H9 Cl2 N3 O2    | 95.0         | 0.115           |           |
| 49 | GM308     | <chem>BrC1CCCC(c1)c2noc(NC(=O)c3ccccc3)n2</chem>                       | C15 H10 Br N3 O2    | 13.0         | 1.581           |           |
| 50 | GM340     | <chem>Clc1CCCC(c1)c2noc(NC(=O)c3ccccc3)n2</chem>                       | C15 H10 Cl N3 O2    | 22.0         | 2.770           |           |
| 51 | GM347     | <chem>COc1ccc(cc1OC)C(=O)Nc2onc(n2)c3ccc(Cl)c(Cl)c3</chem>             | C17 H13 Cl2 N3 O4   | 94.4         | 0.065           |           |
| 52 | GM466     | <chem>COc1ccc(cc1OC)C(=O)Nc2onc(n2)c3cccc(Cl)c3</chem>                 | C17 H14 Cl N3 O4    | 56.4         | 0.782           |           |
| 53 | GM760     | <chem>CCOP(=O)(OCC)Oc1cc(ccc1OC)C(=O)Nc2onc(n2)c3ccc(Cl)c(Cl)c3</chem> | C20 H20 Cl2 N3 O7 P | 91.6         | 0.020           |           |

### Model 2

| No | Comp name | Smiles                                                       | Molecular Formula | KMO pIC50 | KMO IC50, nM | reference |
|----|-----------|--------------------------------------------------------------|-------------------|-----------|--------------|-----------|
| 1  | 1         | <chem>[NH3+][C@@H](CC(=O)c1ccc(Cl)c(Cl)c1)C(=O)[O-]</chem>   | C10 H9 Cl2 N O3   | 6.5       | 330          | [5]       |
| 2  | 2         | <chem>[O-]C(=O)CCC(=O)c1ccc(Cl)c(Cl)c1</chem>                | C10 H7 Cl2 O3     | 5.4       | 3900         |           |
| 3  | 4         | <chem>C[C@@H](CC(=O)c1ccc(Cl)c(Cl)c1)C(=O)[O-]</chem>        | C11 H9 Cl2 O3     | 5.2       | 6900         |           |
| 4  | 5         | <chem>CO[C@@H](CC(=O)c1ccc(Cl)c(Cl)c1)C(=O)[O-]</chem>       | C11 H9 Cl2 O4     | 5.2       | 6900         |           |
| 5  | 6         | <chem>[O-]C(=O)\C=C\C(=O)c1ccc(Cl)c(Cl)c1</chem>             | C10 H5 Cl2 O3     | 4.4       | 36000        |           |
| 6  | 7         | <chem>[O-]C(=O)[C@@H](Cl)CC(=O)c1ccc(Cl)c(Cl)c1</chem>       | C10 H6 Cl3 O3     | 4.8       | 14800        |           |
| 7  | 9         | <chem>[O-]C(=O)[C@@H](CC(=O)c1ccc(Cl)c(Cl)c1)c2ccccc2</chem> | C10 H7 Cl2 O4     | 4.7       | 19500        |           |
| 8  | 15        | <chem>[O-]C(=O)\C=C\C(=O)c1ccc(Cl)c(Cl)c1</chem>             | C16 H11 Cl2 O3    | 5.0       | 10400        |           |
| 9  | 16        | <chem>[O-]C(=O)\C=C\C(=O)c1ccc(F)c(F)c1</chem>               | C17 H13 Cl2 O3    | 4.7       | 21100        |           |
| 10 | 17        | <chem>C\C(=C/C(=O)c1ccc(Cl)c(Cl)c1)\C(=O)[O-]</chem>         | C10 H5 F2 O3      | 4.9       | 11300        |           |
| 11 | 18        | <chem>O\C(=C\C(=O)c1ccc(Cl)c(Cl)c1)\C(=O)[O-]</chem>         | C11 H7 Cl2 O3     | 5.2       | 6400         |           |
| 12 | 19        | <chem>O\C(=C\C(=O)c1ccc(F)c(F)c1)\C(=O)[O-]</chem>           | C10 H5 Cl2 O4     | 5.9       | 1200         |           |
| 13 | 20        | <chem>O[C@@H](CC(=O)c1cccc(Cl)c1)C(=O)[O-]</chem>            | C10 H5 F2 O4      | 6.0       | 1100         |           |
| 14 | 21        | <chem>O[C@@H](CC(=O)c1cccc(F)c1)C(=O)[O-]</chem>             | C10 H8 Cl O4      | 5.0       | 9100         |           |
| 15 | 22        | <chem>O[C@@H](CC(=O)c1cccc(c1)[N+](=O)[O-])C(=O)[O-]</chem>  | C10 H8 F O4       | 4.9       | 11500        |           |
| 16 | 23        | <chem>O[C@@H](CC(=O)c1ccc(F)c(F)c1)C(=O)[O-]</chem>          | C10 H8 N O6       | 5.5       | 3000         |           |
| 17 | 25        | <chem>O[C@@H](CC(=O)c1ccc(Cl)c(Cl)c1)C(=O)[O-]</chem>        | C10 H7 F2 O4      | 6.4       | 420          |           |
| 18 | 26        | <chem>O[C@H](CC(=O)c1ccc(Cl)c(Cl)c1)C(=O)[O-]</chem>         | C10 H7 Cl2 O4     | 4.8       | 14400        |           |
| 19 | 27        | <chem>[O-]C(=O)[C@H](CC(=O)c1ccc(Cl)c(Cl)c1)Cc2ccccc2</chem> | C17 H13 Cl2 O3    | 5.6       | 2300         |           |
| 20 | 28        | <chem>[O-]C(=O)[C@H](CC(=O)c1ccc(Cl)c(Cl)c1)Cc2ccccc2</chem> | C10 H5 Cl2 O3     | 5.0       | 10700        |           |
| 21 | 2a        | <chem>[NH3+][C@H](CC(=O)c1ccc(Cl)c(Cl)c1)C(=O)[O-]</chem>    | C10 H9 Cl2 N O3   | 6.5       | 300          | [6]       |

|    |    |                                                    |                   |     |       |     |
|----|----|----------------------------------------------------|-------------------|-----|-------|-----|
| 22 | 2b | [NH3+][C@@H](CC(=O)c1ccc(Cl)c(Cl)c1)C(=O)[O-]      | C10 H11 N O3      | 5.7 | 2100  | [7] |
| 23 | 3a | [NH3+][C@H](CC(=O)c1ccccc1)C(=O)[O-]               | C10 H9 Cl2 N O3   | 4.8 | 16000 |     |
| 24 | 3  | [NH3+][C@@H](CC(=O)c1ccc(c1)[N+](=O)[O-])C(=O)[O-] | C10 H10 N2 O5     | 6.0 | 900   |     |
| 25 | 9  | [O-]C(=O)[C@H]1C[C@@H]1C(=O)c2ccc(Cl)c(Cl)c2       | C11 H7 Cl2 O3     | 7.7 | 20    |     |
| 26 | 7  | [O-]C(=O)CCn1ncc2ccccc12                           | C10 H8 Cl N2 O2   | 5.2 | 6310  | [8] |
| 27 | 8  | [O-]C(=O)CCn1ncc2cc(Cl)ccc12                       | C11 H10 Cl N2 O2  | 6.0 | 1000  |     |
| 28 | 9  | [O-]C(=O)CCn1ncc2ccc(Cl)cc12                       | C11 H10 Cl N2 O2  | 7.3 | 50    |     |
| 29 | 10 | C[C@H](CC(=O)[O-])n1ncc2ccc(Cl)cc12                | C10 H8 Cl N2 O3   | 5.3 | 5012  |     |
| 30 | 11 | C[C@H](Cn1ncc2ccc(Cl)cc12)C(=O)[O-]                | C10 H10 Cl N3 O2  | 5.6 | 2512  |     |
| 31 | 12 | O[C@H](Cn1ncc2ccc(Cl)cc12)C(=O)[O-]                | C11 H10 Cl N2 O2  | 6.2 | 631   |     |
| 32 | 13 | [NH3+][C@H](Cn1ncc2ccc(Cl)cc12)C(=O)[O-]           | C9 H6 Cl N2 O2    | 5.6 | 2512  |     |
| 33 | 14 | [O-]C(=O)CCn1ncc2ccc(Cl)cc12                       | C11 H10 Cl N2 O2  | 5.5 | 3162  |     |
| 34 | 15 | [O-]C(=O)Cn1ncc2ccc(Cl)cc12                        | C11 H9 Cl N O2    | 7.0 | 100   |     |
| 35 | 16 | Cc1nn(CCC(=O)[O-])c2cc(Cl)ccc12                    | C9 H7 Cl N3 O2    | 5.7 | 1995  |     |
| 36 | 17 | [O-]C(=O)CCn1ccc2ccc(Cl)cc12                       | C10 H8 Cl N2 O2   | 6.9 | 126   |     |
| 37 | 18 | [O-]C(=O)CCn1nnc2ccc(Cl)cc12                       | C10 H8 Cl N2 O3   | 6.3 | 501   |     |
| 38 | 19 | [O-]C(=O)CCn1cnc2ccc(Cl)cc12                       | C10 H7 Cl N O4    | 5.0 | 10000 |     |
| 39 | 20 | [O-]C(=O)CCN1C(=O)Nc2ccc(Cl)cc12                   | C10 H7 Cl N O3    | 5.2 | 6310  |     |
| 40 | 21 | [O-]C(=O)CCN1C(=O)Oc2ccc(Cl)cc12                   | C11 H9 Cl N O4    | 7.9 | 13    |     |
| 41 | 22 | [O-]C(=O)CCc1noc2ccc(Cl)cc12                       | C11 H7 N2 O4      | 7.6 | 25    |     |
| 42 | 23 | [O-]C(=O)CCN1C(=O)COc2ccc(Cl)cc12                  | C11 H10 N O5      | 7.1 | 79    |     |
| 43 | 24 | [O-]C(=O)CCN1C(=O)Oc2ccc(cc12)C#N                  | C11 H7 F3 N O4    | 6.2 | 631   |     |
| 44 | 25 | COc1ccc2OC(=O)N(CCC(=O)[O-])c2c1                   | C10 H7 Br N O4    | 6.0 | 1000  |     |
| 45 | 26 | [O-]C(=O)CCN1C(=O)Oc2ccc(cc12)C(F)(F)F             | C11 H10 N O4      | 5.3 | 5012  |     |
| 46 | 27 | [O-]C(=O)CCN1C(=O)Oc2ccc(Br)cc12                   | C11 H9 Cl N O4    | 7.4 | 40    |     |
| 47 | 28 | Cc1ccc2OC(=O)N(CCC(=O)[O-])c2c1                    | C14 H15 Cl N O4   | 5.5 | 3162  |     |
| 48 | 29 | Cc1cc(Cl)cc2N(CCC(=O)[O-])C(=O)Oc12                | C11 H9 Cl N O5    | 7.2 | 63    |     |
| 49 | 30 | Cc1cc2OC(=O)N(CCC(=O)[O-])c2cc1Cl                  | C12 H11 Cl N O5   | 7.9 | 13    |     |
| 50 | 31 | [O-]C(=O)CCN1C(=O)Oc2cc(Cl)c(Cl)cc12               | C12 H11 Cl N O4   | 8.2 | 6     |     |
| 51 | 34 | CCc1cc2OC(=O)N(CCC(=O)[O-])c2cc1Cl                 | C13 H11 Cl N O5   | 8.0 | 10    |     |
| 52 | 35 | CC(C)Cc1cc2OC(=O)N(CCC(=O)[O-])c2cc1Cl             | C11 H9 Cl N O4    | 7.0 | 100   |     |
| 53 | 36 | COc1cc2OC(=O)N(CCC(=O)[O-])c2cc1Cl                 | C10 H6 Cl2 N O4   | 7.9 | 13    |     |
| 54 | 37 | CCOc1cc2OC(=O)N(CCC(=O)[O-])c2cc1Cl                | C11 H6 Cl N2 O2   | 8.3 | 5     |     |
| 55 | 39 | [O-]C(=O)CCN1C(=O)Oc2cc(OC3CC3)c(Cl)cc12           | C11 H5 Cl2 N2 O2  | 8.5 | 3     |     |
| 56 | 6  | [O-]C(=O)c1cc(ncn1)c2cccc(Cl)c2                    | C10 H9 N2 O2      | 9.3 | 0.5   | [3] |
| 57 | 7  | [O-]C(=O)c1cc(ncn1)c2ccc(Cl)c(Cl)c2                | C10 H8 Cl N2 O2   | 9.2 | 0.6   |     |
| 58 | 46 | [O-]C(=O)c1cc(ncn1)c2ccccc2                        | C11 H7 N2 O2      | 7.4 | 38    |     |
| 59 | 52 | [O-]C(=O)c1cc(ncn1)c2ccc(Cl)cc2                    | C11 H6 Cl N2 O2   | 8.0 | 11    |     |
| 60 | 53 | [O-]C(=O)c1cc(ncn1)c2cc(Cl)cc(Cl)c2                | C11 H5 Cl2 N2 O2  | 7.7 | 19    |     |
| 61 | 54 | [O-]C(=O)c1cc(ncn1)c2cccc(F)c2                     | C11 H6 F N2 O2    | 9.5 | 0.3   |     |
| 62 | 55 | [O-]C(=O)c1cc(ncn1)c2ccc(F)c(Cl)c2                 | C11 H5 Cl F N2 O2 | 9.0 | 0.9   |     |
| 63 | 56 | [O-]C(=O)c1cc(ncn1)c2ccc(Cl)c(F)c2                 | C11 H5 Cl F N2 O2 | 9.5 | 0.3   |     |
| 64 | 57 | [O-]C(=O)c1cc(ncn1)c2cccc(Cl)c2F                   | C11 H5 Cl F N2 O2 | 9.7 | 0.2   |     |
| 65 | 58 | [O-]C(=O)c1cc(ncn1)c2ccc(F)c(F)c2                  | C11 H5 F2 N2 O2   | 9.7 | 0.2   |     |

|    |    |                                                           |                    |     |      |     |
|----|----|-----------------------------------------------------------|--------------------|-----|------|-----|
| 66 | 59 | <chem>[O-]C(=O)c1cc(ncn1)c2ccc(F)cc2F</chem>              | C11 H5 F2 N2 O2    | 7.1 | 76   |     |
| 67 | 60 | <chem>[O-]C(=O)c1cc(ncn1)c2ccc(Cl)cc2F</chem>             | C11 H5 Cl F N2 O2  | 7.4 | 38   |     |
| 68 | 61 | <chem>[O-]C(=O)c1cc(ncn1)c2ccc(c(Cl)c2)C(F)(F)F</chem>    | C12 H5 Cl F3 N2 O2 | 8.3 | 5    |     |
| 69 | 62 | <chem>[O-]C(=O)c1cc(ncn1)c2cccc(c2)C(F)(F)F</chem>        | C12 H6 F3 N2 O2    | 7.7 | 22   |     |
| 70 | 63 | <chem>[O-]C(=O)c1cc(ncn1)c2ccccc2C(F)(F)F</chem>          | C12 H6 F3 N2 O2    | 5.2 | 6510 |     |
| 71 | 64 | <chem>Cc1cccc(c1)c2cc(ncn2)C(=O)[O-]</chem>               | C12 H9 N2 O2       | 7.8 | 17   |     |
| 72 | 65 | <chem>[O-]C(=O)c1cc(ncn1)c2ccc(F)c(c2)C(F)(F)F</chem>     | C12 H5 F4 N2 O2    | 7.5 | 32   |     |
| 73 | 66 | <chem>Cc1ccc(cc1Cl)c2cc(ncn2)C(=O)[O-]</chem>             | C12 H8 Cl N2 O2    | 9.2 | 0.7  |     |
| 74 | 67 | <chem>Cc1ccc(cc1F)c2cc(ncn2)C(=O)[O-]</chem>              | C12 H8 F N2 O2     | 9.0 | 0.9  |     |
| 75 | 68 | <chem>COc1cc(ccc1Cl)c2cc(ncn2)C(=O)[O-]</chem>            | C12 H8 Cl N2 O3    | 7.2 | 60   |     |
| 76 | 69 | <chem>[O-]C(=O)c1cc(ncn1)c2ccc(Cl)c(OCCN3CCOCC3)c2</chem> | C17 H17 Cl N3 O4   | 5.7 | 2050 |     |
| 77 | 70 | <chem>[O-]C(=O)c1cc(ncn1)c2ccc(OCCN3CCOCC3)c(Cl)c2</chem> | C17 H17 Cl N3 O4   | 7.1 | 83   |     |
| 78 | 71 | <chem>[O-]C(=O)c1cc(ncn1)c2ccc(N3CCCC3)c(Cl)c2</chem>     | C15 H13 Cl N3 O2   | 6.3 | 550  |     |
| 79 | 72 | <chem>[O-]C(=O)c1cc(ncn1)c2ccc(OC(F)(F)F)c(Cl)c2</chem>   | C12 H5 Cl F3 N2 O3 | 8.7 | 2.1  |     |
| 80 | 73 | <chem>COc1ccc(cc1Cl)c2cc(ncn2)C(=O)[O-]</chem>            | C12 H8 Cl N2 O3    | 8.9 | 1.2  |     |
| 81 | 76 | <chem>[O-]C(=O)c1cc(ncn1)c2ccc(OCC3CC3)c(Cl)c2</chem>     | C15 H12 Cl N2 O3   | 7.3 | 49   |     |
| 82 | 8  | <chem>[O-]C(=O)CCN1C(=O)Oc2cc(OCC3CC3)c(Cl)cc12</chem>    | C14 H13 Cl N O5    | 8.0 | 10   | [2] |
| 83 | 9  | <chem>[O-]C(=O)CCN1C(=O)Oc2cc(OCC3CC3)c(Cl)cc12</chem>    | C15 H15 Cl N O5    | 7.6 | 25   |     |

Model 3

| No | Comp name | Smiles                                                              | Molecular Formula  | KMO pIC50 | KMO IC50, nM | reference |
|----|-----------|---------------------------------------------------------------------|--------------------|-----------|--------------|-----------|
| 1  | 11        | <chem>[O-]C(=O)CCN1C(=O)Oc2cc(OCCN3CCCC3)c(Cl)cc12</chem>           | C16 H18 Cl N2 O5   | 6.1       | 794          | [2]       |
| 2  | 12        | <chem>[O-]C(=O)CCN1C(=O)Oc2cc(OC(=O)c3ccccc3)c(Cl)cc12</chem>       | C17 H11 Cl N O6    | 7.6       | 25.1         |           |
| 3  | 13        | <chem>[O-]C(=O)CCN1C(=O)Oc2cc(OCc3ccccc3)c(Cl)cc12</chem>           | C16 H12 Cl N2 O5   | 8.5       | 3.16         |           |
| 4  | 15        | <chem>C[C@@H](Oc1cc2OC(=O)N(CCC(=O)[O-])c2cc1Cl)c3ccccc3</chem>     | C17 H14 Cl N2 O5   | 8.6       | 2.51         |           |
| 5  | 16        | <chem>C[C@H](Oc1cc2OC(=O)N(CCC(=O)[O-])c2cc1Cl)c3ccccc3</chem>      | C17 H14 Cl N2 O5   | 6.6       | 251          |           |
| 6  | 17        | <chem>C[C@@H](Oc1cc2OC(=O)N(CCC(=O)[O-])c2cc1Cl)c3occcn3</chem>     | C15 H12 Cl N2 O6   | 8.5       | 3.16         |           |
| 7  | 18        | <chem>C[C@@H](Oc1cc2OC(=O)N(CCC(=O)[O-])c2cc1Cl)c3ncccn3</chem>     | C16 H13 Cl N3 O5   | 8.3       | 5.01         |           |
| 8  | 19        | <chem>C[C@@H](Oc1cc2OC(=O)N(CCC(=O)[O-])c2cc1Cl)c3cccn3</chem>      | C16 H13 Cl N3 O5   | 8.9       | 1.26         |           |
| 9  | 20        | <chem>C[C@@H](Oc1cc2OC(=O)N(CCC(=O)[O-])c2cc1Cl)c3cc(C)ccn3</chem>  | C18 H16 Cl N2 O5   | 8.4       | 3.98         |           |
| 10 | 21        | <chem>C[C@@H](Oc1cc2OC(=O)N(CCC(=O)[O-])c2cc1Cl)c3ccc(C)cn3</chem>  | C18 H16 Cl N2 O5   | 8.5       | 3.16         |           |
| 11 | 22        | <chem>C[C@@H](Oc1cc2OC(=O)N(CCC(=O)[O-])c2cc1Cl)c3ccc(Cl)cn3</chem> | C17 H13 Cl2 N2 O5  | 8.5       | 3.16         |           |
| 12 | 23        | <chem>C[C@@H](Oc1cc2OC(=O)N(CCC(=O)[O-])c2cc1Cl)c3ccc(F)cn3</chem>  | C17 H13 Cl F N2 O5 | 8.6       | 2.51         |           |
| 13 | 24        | <chem>C[C@@H](Oc1cc2OC(=O)N(CCC(=O)[O-])c2cc1Cl)c3cccc(C)n3</chem>  | C18 H16 Cl N2 O5   | 8.3       | 5.01         |           |
| 14 | 25        | <chem>C[C@@H](Oc1cc2OCC(=O)N(CCC(=O)[O-])c2cc1Cl)c3ccccc3</chem>    | C18 H16 Cl N2 O5   | 8.3       | 5.01         |           |
| 15 | 26        | <chem>C[C@@H](Oc1cc2ccn(CCC(=O)[O-])c2cc1Cl)c3ccccc3</chem>         | C18 H16 Cl N2 O3   | 8.3       | 5.01         |           |
| 16 | 27        | <chem>C[C@@H](Oc1cc2cnn(CCC(=O)[O-])c2cc1Cl)c3ccccc3</chem>         | C17 H15 Cl N3 O3   | 8.5       | 3.16         |           |
| 17 | 28        | <chem>C[C@@H](Oc1cc2onc(CCC(=O)[O-])c2cc1Cl)c3ccccc3</chem>         | C17 H14 Cl N2 O4   | 8.3       | 5.01         |           |
| 18 | 29        | <chem>C[C@@H](Oc1cc2SC(=O)N(CCC(=O)[O-])c2cc1Cl)c3ccccc3</chem>     | C17 H14 Cl N2 O4 S | 8.7       | 2.00         |           |
| 19 | 30        | <chem>C[C@@H](Oc1cc2onc(CCC(=O)[O-])c2cc1Cl)c3ccc(C)cn3</chem>      | C18 H16 Cl N2 O4   | 8.5       | 3.16         |           |
| 20 | 31        | <chem>C[C@@H](Oc1cc2onc(CCC(=O)[O-])c2cc1Cl)c3ccc(Cl)cn3</chem>     | C17 H13 Cl2 N2 O4  | 8.5       | 3.16         |           |
| 21 | 32        | <chem>C[C@@H](Oc1cc2onc(CCC(=O)[O-])c2cc1Cl)c3ccc(F)cn3</chem>      | C17 H13 Cl F N2 O4 | 8.5       | 3.16         |           |
| 22 | 33        | <chem>C[C@@H](Oc1cc2onc(CCC(=O)[O-])c2cc1Cl)c3ccc(C)nn3</chem>      | C17 H15 Cl N3 O4   | 8.7       | 2.00         |           |

\* All of the listed compounds were used to validate the protein-ligand complex pharmacophores, as well as served as the initial input molecules for DUD-E decoy generation. Compound highlighted in bold were included in the docking accuracy validation test.

### Supplementary References

1. Röver, S.; Cesura, A.M.; Huguenin, P.; Kettler, R.; Szente, A. Synthesis and Biochemical Evaluation of N-(4-Phenylthiazol-2-yl)benzenesulfonamides as High-Affinity Inhibitors of Kynurenine 3-Hydroxylase. *J. Med. Chem.* **1997**, *40*, 4378–4385, doi:10.1021/jm970467t
2. Walker, A.L.; Ancellin, N.; Beaufils, B.; Bergeal, M.; Binnie, M.; Bouillot, A.; Clapham, D.; Denis, A.; Haslam, C.P.; Holmes, D.S.; et al. Development of a Series of Kynurenine 3-Monooxygenase Inhibitors Leading to a Clinical Candidate for the Treatment of Acute Pancreatitis. *J. Med. Chem.* **2017**, *60*, 3383–3404, doi:10.1021/acs.jmedchem.7b00055.
3. Toledo-Sherman, L.M.; Prime, M.E.; Mrzljak, L.; Beconi, M.G.; Beresford, A.; Brookfield, F.A.; Brown, C.J.; Cardaun, I.; Courtney, S.M.; Dijkman, U.; et al. Development of a series of aryl pyrimidine kynurenine monooxygenase inhibitors as potential therapeutic agents for the treatment of Huntingtons disease. *J. Med. Chem.* **2015**, *58*, 1159–1183, doi:10.1021/jm501350y.
4. Wilkinson, M. Structural Dynamics and Ligand Binding in Kynurenine-3- monooxygenase, Doctoral Thesis, The University Of Edinburgh, Edinburgh, Scotland 2013.
5. Giordani, A.; Pevarello, P.; Cini, M.; Bormetti, R.; Greco, F.; Toma, S.; Speciale, C.; Varasi, M. 4-Phenyl-4-oxo-butanoic acid derivatives inhibitors of kynurenine 3-hydroxylase. *Bioorg. Med. Chem. Lett.* **1998**, *8*, 2907–2912, doi:10.1016/S0960-894X(98)00517-4.
6. Giordani, A.; Corti, L.; Cini, M.; Bormetti, R.; Marconi, M.; Veneroni, O.; Speciale, C.; Varasi, M. Enantiospecific Synthesis and in vitro Activity of Selective Inhibitors of Rat Brain Kynureninase and Kynurenine-3-Hydroxylase. In *Recent Advances in Tryptophan Research. Advances in Experimental Medicine and Biology*; Springer, Boston, MA, 1996; pp. 531–534.
7. Phillips, R.S.; Iradukunda, E.C.; Hughes, T.; Phillip Bowen, J. Modulation of enzyme activity in the kynurenine pathway by kynurenine monooxygenase inhibition. *Front. Mol. Biosci.* **2019**, *6*, doi:10.3389/fmolb.2019.00003.
8. Liddle, J.; Beaufils, B.; Binnie, M.; Bouillot, A.; Denis, A.A.; Hann, M.M.; Haslam, C.P.; Holmes, D.S.; Hutchinson, J.P.; Kranz, M.; et al. The discovery of potent and selective kynurenine 3-monooxygenase inhibitors for the treatment of acute pancreatitis. *Bioorganic Med. Chem. Lett.* **2017**, *27*, 2023–2028, doi:10.1016/j.bmcl.2017.02.078.
